# Supplementary material for: Repeated out-of-Africa expansions of Helicobacter pylori driven by replacement of deleterious mutations
Source: PubMed Central journal article supplement (PMC9652371; doi:10.1038/s41467-022-34475-3), 2022-11-11
Supplement: 41467_2022_34475_MOESM2_ESM.pdf [file 41467_2022_34475_MOESM2_ESM.pdf]

### **Description of Additional Supplementary Files**

File Name: Supplementary Data 1

Description: Newly sequenced strains in this study

File Name: Supplementary Data 2

Description: Publicly available strains used in the study

File Name: Supplementary Data 3

Description: Summary of isolates sequenced in this study

File Name: Supplementary Data 4

Description: Assembly and Annotation statistics Newly Sequenced genomes

File Name: Supplementary Data 5

Description: All strains in the dataset and how they were used in the different analyses

File Name: Supplementary Data 6

Description: donors used for D-statistics calculations

File Name: Supplementary Data 7

Description: donors used for D-statistics calculations

File Name: Supplementary Data 8

Description: gene-by-gene African ancestry
