# Supplementary material for: Repeated out-of-Africa expansions of Helicobacter pylori driven by replacement of deleterious mutations
Source: PubMed Central journal article supplement (PMC9652371; doi:10.1038/s41467-022-34475-3), 2022-11-11
Supplement: 41467_2022_34475_MOESM4_ESM.pdf [file 41467_2022_34475_MOESM4_ESM.pdf]

## Reporting Summary

Nature Research wishes to improve the reproducibility of the work that we publish. This form provides structure for consistency and transparency in reporting. For further information on Nature Research policies, see [Authors & Referees](#) and the [Editorial Policy Checklist](#).

### Statistics

For all statistical analyses, confirm that the following items are present in the figure legend, table legend, main text, or Methods section.

n/a Confirmed

- The exact sample size ( $n$ ) for each experimental group/condition, given as a discrete number and unit of measurement
- A statement on whether measurements were taken from distinct samples or whether the same sample was measured repeatedly
- The statistical test(s) used AND whether they are one- or two-sided  
*Only common tests should be described solely by name; describe more complex techniques in the Methods section.*
- A description of all covariates tested
- A description of any assumptions or corrections, such as tests of normality and adjustment for multiple comparisons
- A full description of the statistical parameters including central tendency (e.g. means) or other basic estimates (e.g. regression coefficient) AND variation (e.g. standard deviation) or associated estimates of uncertainty (e.g. confidence intervals)
- For null hypothesis testing, the test statistic (e.g.  $F$ ,  $t$ ,  $r$ ) with confidence intervals, effect sizes, degrees of freedom and  $P$  value noted  
*Give  $P$  values as exact values whenever suitable.*
- For Bayesian analysis, information on the choice of priors and Markov chain Monte Carlo settings
- For hierarchical and complex designs, identification of the appropriate level for tests and full reporting of outcomes
- Estimates of effect sizes (e.g. Cohen's  $d$ , Pearson's  $r$ ), indicating how they were calculated

*Our web collection on [statistics for biologists](#) contains articles on many of the points above.*

### Software and code

Policy information about [availability of computer code](#)

Data collection

the simulation data was generated using a custom script run in SLiM v. 3.6 (<https://github.com/EliseTourrette/Hpylori/tree/main/HpEurope>)

Data analysis

For newly sequenced genomes  
genome quality filtering:  
KI genomes: TrimGalore!  
MHH genomes: Trimmomatic v0.36  
HPI genomes: FASTQC  
UBa genomes: Trimmomatic v0.33  
OiU genomes: Trimmomatic v0.35

assemblies:

KI genomes: SPAdes  
MHH genomes: SPAdes v3.9.0, quality control with QUAST  
HPI genomes: SPAdes v3.5.0  
UBa genomes: Velvet v1.2.08  
OiU genomes: SPAdes v3.12.0

For all genomes:

annotation:  
prokka v1.12  
genome size and contig/scaffold number collected from prokka output with MultiQC

alignment:  
Snippy v3.2-dev

population structure:  
fineSTRUCTURE v0.02  
ChromoPainter v0.04

PCA:  
PLINK v1.9

D-statistics:  
popstats (no version)

chromosome painting:  
ChromoPainterV2

dN/dS calculation:  
PAML v4.7

Admixture graphs:  
Treemix v1.12

Rate of non-adaptive non-synonymous amino acid substitutions:  
GRAPES v1.1.1

R packages:  
mvoutlier (function aq.plot())  
PopGenome  
Tidyverse  
ggplot2

the scripts used for the analysis of the simulations, using R v4.1.1 and python v3.9.6, can be found here <https://github.com/EliseTourrette/Hpylori/tree/main/HpEurope>

For manuscripts utilizing custom algorithms or software that are central to the research but not yet described in published literature, software must be made available to editors/reviewers. We strongly encourage code deposition in a community repository (e.g. GitHub). See the Nature Research [guidelines for submitting code & software](#) for further information.

## Data

Policy information about [availability of data](#)

All manuscripts must include a [data availability statement](#). This statement should provide the following information, where applicable:

- Accession codes, unique identifiers, or web links for publicly available datasets
- A list of figures that have associated raw data
- A description of any restrictions on data availability

All newly sequenced genomes can be found in GenBank (<https://www.ncbi.nlm.nih.gov/genbank/>) under BioProject PRJNA479414. Individual accessions of the genomes can be found in Supplementary data 1. For the publicly available genomes, GenBank accessions or equivalents in other databases can be found in Supplementary Data 2. The entire dataset of 716 genomes have been deposited in Data Dryad, accessible here: <https://doi.org/10.5061/dryad.v9s4mw70c>.

## Field-specific reporting

Please select the one below that is the best fit for your research. If you are not sure, read the appropriate sections before making your selection.

Life sciences  Behavioural & social sciences  Ecological, evolutionary & environmental sciences

For a reference copy of the document with all sections, see [nature.com/documents/nr-reporting-summary-flat.pdf](https://nature.com/documents/nr-reporting-summary-flat.pdf)

## Ecological, evolutionary & environmental sciences study design

All studies must disclose on these points even when the disclosure is negative.

Study description

This study looks at the evolutionary history of a dataset of 716 *Helicobacter pylori* sequences sampled in different parts of the world.

Research sample

A dataset of 716 *Helicobacter pylori* whole-genome sequences was assembled, consisting of 213 newly sequenced isolates from Europe, Asia and Africa (Table Supplementary Data 1) and selected publicly available genomes (Table Supplementary Data 2). To complement the publicly available data, we included isolate collections from the following three main geographical areas: Europe, Middle East, North East Africa and South East Asia. This new dataset is summarized in (Supplementary Data 3), including citations and details on ethical approval for the respective cohorts. The European and Middle Eastern genomes were included to obtain a more

comprehensive mapping of ancestries within the area, the genomes from Central and North East Africa to have solid whole genome representation of the “Ancestral Europe” population. Lastly, the South East Asian genomes were chosen due to their unadmixed hpAsia2 background to serve as donors for hpAsia2 ancestry. For details on sample collection and bacterial isolation in the different cohorts, see Supplementary Methods

## Sampling strategy

The cohorts, sampling procedure and bacterial isolation is detailed in the Supplementary Methods section together with the procedures for DNA extraction, library preparation, sequencing and primary bioinformatics

## Data collection

Sequences were sequenced in five different centres: Karolinska Institute (Sweden), Hannover Medical School (Germany), Hellenic Pasteur Institute (Greece), Oita University (Japan) and the University of Bath (UK). The primary bioinformatics analysis (trimming, filtering, quality check and assemblies) were also done separately.

## Timing and spatial scale

The clinical samples were collected in several different cohorts over the last 30 years and were selected to represent geographical areas or human populations rather than reflecting a specific time interval. They are not necessarily a representative sample either geographically or pathologically since *H. pylori* requires endoscopy, an invasive medical intervention and therefore are collected opportunistically, normally from middle age people with some kind of gastric complaint. The details on collection year, where available, are now added to Supplementary Data 2.

## Data exclusions

Which genomes that have been used for what purposes and, if they have been excluded from some of the analyses, why that is, is detailed in Supplementary Data 5. We have also provided a statement pointing to this information in the Methods section.

## Reproducibility

Multiple isolates from the same geographical zone/population were sampled in order to assess the variability of the different measurements.

## Randomization

The group allocations, apart from geographical origin, were the *H. pylori* subpopulations, which were inferred from the analysis results (fineSTRUCTURE analysis, Supp. Figure 1.)

## Blinding

As the categories in terms of population assignment were central to the downstream analyses and result interpretation, blinding of the group allocation was not suitable for this study.

Did the study involve field work?  Yes  No

## Reporting for specific materials, systems and methods

We require information from authors about some types of materials, experimental systems and methods used in many studies. Here, indicate whether each material, system or method listed is relevant to your study. If you are not sure if a list item applies to your research, read the appropriate section before selecting a response.

### Materials & experimental systems

| n/a                                 | Involved in the study                                           |
|-------------------------------------|-----------------------------------------------------------------|
| <input checked="" type="checkbox"/> | <input type="checkbox"/> Antibodies                             |
| <input checked="" type="checkbox"/> | <input type="checkbox"/> Eukaryotic cell lines                  |
| <input checked="" type="checkbox"/> | <input type="checkbox"/> Palaeontology                          |
| <input checked="" type="checkbox"/> | <input type="checkbox"/> Animals and other organisms            |
| <input type="checkbox"/>            | <input checked="" type="checkbox"/> Human research participants |
| <input checked="" type="checkbox"/> | <input type="checkbox"/> Clinical data                          |

### Methods

| n/a                                 | Involved in the study                           |
|-------------------------------------|-------------------------------------------------|
| <input checked="" type="checkbox"/> | <input type="checkbox"/> ChIP-seq               |
| <input checked="" type="checkbox"/> | <input type="checkbox"/> Flow cytometry         |
| <input checked="" type="checkbox"/> | <input type="checkbox"/> MRI-based neuroimaging |

## Human research participants

Policy information about [studies involving human research participants](#)

|                            |                                                                                                                                                                                                                                                                                                                                                                                                                                                                                                                                                                                                                                                                                                                                                                                                                                                                                                                                                                                                                                                                                                                                                                                    |
|----------------------------|------------------------------------------------------------------------------------------------------------------------------------------------------------------------------------------------------------------------------------------------------------------------------------------------------------------------------------------------------------------------------------------------------------------------------------------------------------------------------------------------------------------------------------------------------------------------------------------------------------------------------------------------------------------------------------------------------------------------------------------------------------------------------------------------------------------------------------------------------------------------------------------------------------------------------------------------------------------------------------------------------------------------------------------------------------------------------------------------------------------------------------------------------------------------------------|
| Population characteristics | The clinical samples were collected in several different cohorts over the last 30 years and were selected to represent geographical areas or human populations. They are not necessarily a representative sample either geographically or pathologically since <i>H. pylori</i> requires endoscopy, an invasive medical intervention and therefore are collected opportunistically, normally from middle age people with some kind of gastric complaint.                                                                                                                                                                                                                                                                                                                                                                                                                                                                                                                                                                                                                                                                                                                           |
| Recruitment                | Since <i>H. pylori</i> requires endoscopy, an invasive medical intervention, the samples were collected opportunistically, normally from middle age people with some kind of gastric complaint.                                                                                                                                                                                                                                                                                                                                                                                                                                                                                                                                                                                                                                                                                                                                                                                                                                                                                                                                                                                    |
| Ethics oversight           | Ethical permission for the collection of human gastric biopsy material had been obtained for all cohorts, including informed consent from the participating individuals. For details on the board/committee and institution that approved each study protocol, see Supplementary Data 3:<br>Umeå University, Sweden<br>Nottingham University Hospitals NHS Trust and Swansea Bay University Health Board, UK.<br>Health Ethics Commission from the National Institute of Health Dr Ricardo Jorge.<br>Alexandra General Hospital and General Hospital Athens "Evangelismos-Polykliniki", Greece.<br>Rabin Medical Center institutional Ethics Committee, Israel.<br>Digestive Diseases Research Center, Shariati Hospital, Tehran University of Medical Sciences, Iran.<br>0002/ERCC/CBNO2 from the Cameroon Bioethics Initiative<br>Federal Ministry of Health of Sudan<br>Ethics Committee of the Bangladesh Medical Research Council (BMRC) (Dhaka, Bangladesh), and the Oita University Faculty of Medicine, Japan<br>Human Research Ethics Committee of Faculty of Medicine, Thammasat University (Pathum Thani, Thailand), and the Oita University Faculty of Medicine, Japan |

Note that full information on the approval of the study protocol must also be provided in the manuscript.
